# Supplementary material for: Health insurance coverage in low-income and middle-income countries: progress made to date and related changes in private and public health expenditure
Source: PubMed Central journal article supplement — BMJ Glob Health. 2022 May 10;7(5):e008722. doi: 10.1136/bmjgh-2022-008722 (PMC9092126; doi:10.1136/bmjgh-2022-008722), 2022-05-10
Supplement: bmjgh-2022-008722supp001.pdf [file bmjgh-2022-008722supp001.pdf]

**SUPPLEMENTARY MATERIALS****Supplementary tables**

Table S1: Sources of data for health insurance coverage, health expenditure and catastrophic household expenditure on health, and the number of countries for which data was retrievable from each respective source.

| Variable category                   | Source                                    | Count |
|-------------------------------------|-------------------------------------------|-------|
| Health insurance coverage           | DHS                                       | 56    |
|                                     | WHO                                       | 13    |
|                                     | National statistics                       | 11    |
|                                     | Peer-reviewed publication                 | 8     |
|                                     | Multiple Indicator Cluster Surveys (MICS) | 4     |
|                                     | Grey literature publication               | 3     |
|                                     | World Bank                                | 3     |
|                                     | Malaria Indicators Survey (MIS)           | 1     |
|                                     | UHC policy                                | 1     |
|                                     | All health insurance coverage sources     | 100   |
| Health financing indicators         | WHO Global Health Expenditure Database    | 99    |
| Catastrophic expenditure indicators | WHO Global Health Observatory Database    | 89    |

*Table S2: Linear regression output for a model estimating the association between health insurance coverage and expenditure on health as a portion of country GDP (n=99 countries, p=0.175)*

| Variable       | Coefficient | Standard Error | T-statistic | P-value |
|----------------|-------------|----------------|-------------|---------|
| Constant       | 5.63        | 0.362          | 15.6        | <0.001  |
| HI Coverage    | 0.0146      | 0.00829        | 1.76        | 0.0824  |
| GNI per capita | -0.0000283  | 0.0000490      | -0.577      | 0.565   |

*Table S3: Linear regression output for a model estimating the association between health insurance coverage and government, private and external expenditures on health (n=99 countries)*

| Outcome                             | Variable       | Coefficient | Standard Error | T-statistic | P-value |
|-------------------------------------|----------------|-------------|----------------|-------------|---------|
| Government Expenditure <sup>1</sup> | Constant       | 0.0220      | 2.30           | 9.58        | <0.001  |
|                                     | Coverage       | 0.158       | 0.0526         | 3.00        | 0.00342 |
|                                     | GNI per capita | 0.00167     | 0.000311       | 5.37        | <0.001  |
| Private Expenditure <sup>2</sup>    | Constant       | 49.9        | 2.85           | 17.5        | <0.001  |
|                                     | HI Coverage    | -0.109      | 0.0652         | -1.66       | 0.0995  |
|                                     | GNI per capita | 0.0000852   | 0.000386       | 0.221       | 0.826   |
| External Expenditure <sup>3</sup>   | Constant       | 28.1        | 2.03           | 13.827      | <0.001  |
|                                     | HI Coverage    | -0.0493     | 0.0466         | -1.06       | 0.292   |
|                                     | GNI per capita | -0.00176    | 0.000275       | -6.379      | <0.001  |
| Overall P-values:                   |                |             |                |             |         |
| 1: <0.001                           |                |             |                |             |         |
| 2: 0.148                            |                |             |                |             |         |
| 3: <0.001                           |                |             |                |             |         |

*Table S4: Linear regression output for a model estimating the association between health insurance coverage and catastrophic expenditure on health, at both the 10% and 25% of household income thresholds (n=89 countries).*

| Catastrophic Expenditure Outcome   | Variable       | Coefficient | Standard Error | T-statistic | P-value |
|------------------------------------|----------------|-------------|----------------|-------------|---------|
| 10% of HH Expenditure <sup>1</sup> | Constant       | 1.62        | 0.187          | 8.68        | <0.001  |
|                                    | HI Coverage    | -0.00111    | 0.00453        | -0.246      | 0.807   |
|                                    | GNI per capita | 0.0000296   | 0.0000277      | 1.066       | 0.290   |
| 25% of HH Expenditure <sup>2</sup> | Constant       | -0.238      | 0.267          | -0.893      | 0.375   |
|                                    | HI Coverage    | -0.00214    | 0.00648        | -0.331      | 0.741   |
|                                    | GNI per capita | 0.00003.64  | 0.0000396      | 0.918       | 0.361   |
| Overall P-values:                  |                |             |                |             |         |
| 1. 0.451                           |                |             |                |             |         |
| 2. 0.601                           |                |             |                |             |         |

*Table S5: Linear regression output for a model estimating the association between health insurance coverage and impoverishment due to healthcare expenses, at both the \$1.90/day and \$3.20/day poverty line thresholds (n=85 countries).*

| Impoverishment Indicator Outcome | Variable       | Coefficient | Standard Error | T-statistic | P-variable |
|----------------------------------|----------------|-------------|----------------|-------------|------------|
| \$1.90 per day <sup>1</sup>      | Constant       | 1.94        | 0.295          | 6.60        | <0.001     |
|                                  | HI Coverage    | -0.00837    | 0.00690        | -1.21       | 0.228      |
|                                  | GNI per capita | -0.0000770  | 0.0000424      | -1.82       | 0.0729     |
| \$3.20 per day <sup>2</sup>      | Constant       | 1.76        | 0.249          | 7.05        | <0.001     |
|                                  | HI Coverage    | -0.00780    | 0.00583        | -1.34       | 0.185      |
|                                  | GNI per capita | -0.0000221  | 0.0000358      | -0.617      | 0.539      |
| Overall P-values:                |                |             |                |             |            |
| 1. 0.00115                       |                |             |                |             |            |
| 2. 0.0479                        |                |             |                |             |            |

*Table S6: Adjusted linear regression output for a model estimating the association between changes in health insurance coverage over time and changes in government, private and out-of-pocket expenditures on health over time (n=25 countries).*

| Outcome                                | Variable       | Coefficient | Standard Error | T-statistic | P-value |
|----------------------------------------|----------------|-------------|----------------|-------------|---------|
| Government Expenditure <sup>1</sup>    | Constant       | 3.965       | 2.47           | 1.61        | 0.120   |
|                                        | HI Coverage    | -0.143      | 0.184          | -0.780      | 0.442   |
|                                        | GNI per capita | 0.0000165   | 0.000433       | 0.038       | 0.970   |
| Private Expenditure <sup>2</sup>       | Constant       | -1.66       | 2.71           | -0.614      | 0.544   |
|                                        | HI Coverage    | 0.108       | 0.201          | 0.537       | 0.595   |
|                                        | GNI per capita | -0.0000489  | 0.000475       | -0.103      | 0.919   |
| Out-of-pocket Expenditure <sup>3</sup> | Constant       | -3.84       | 2.46           | -1.56       | 0.130   |
|                                        | HI Coverage    | 0.0888      | 0.183          | 0.486       | 0.631   |
|                                        | GNI per capita | 0.000139    | 0.000431       | 0.323       | 0.749   |
| Overall P-values:                      |                |             |                |             |         |
| 1: 0.721                               |                |             |                |             |         |
| 2: 0.864                               |                |             |                |             |         |
| 3: 0.781                               |                |             |                |             |         |

## Supplementary figures

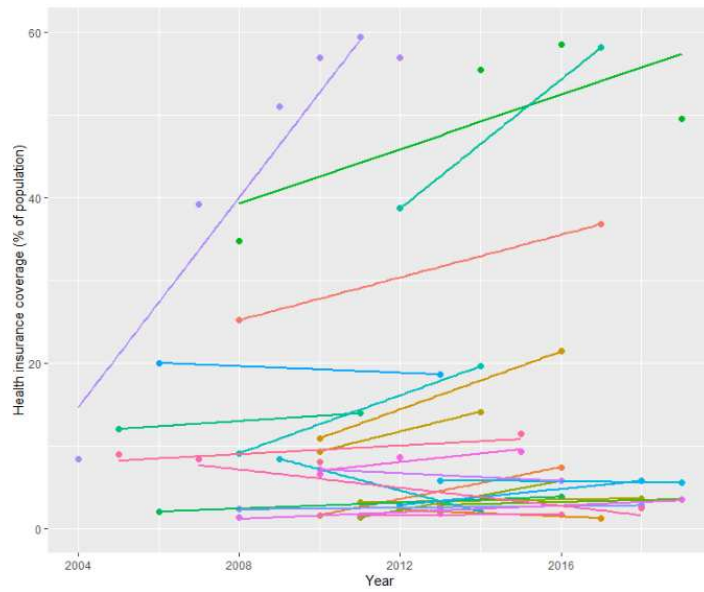

Figure S1: Level of health insurance coverage over time by country ( $n=25$  countries)
