# Supplementary material for: Health insurance coverage in low-income and middle-income countries: progress made to date and related changes in private and public health expenditure
Source: PubMed Central journal article supplement — BMJ Glob Health. 2022 May 10;7(5):e008722. doi: 10.1136/bmjgh-2022-008722 (PMC9092126; doi:10.1136/bmjgh-2022-008722), 2022-05-10
Supplement: bmjgh-2022-008722supp002.pdf [file bmjgh-2022-008722supp002.pdf]

**APPENDIX I**

*Appendix I: Legend of country abbreviations from figure 5.*

| Abbreviation | Country Name |
|--------------|--------------|
| AL           | Albania      |
| AE           | Armenia      |
| BN           | Benin        |
| BI           | Burundi      |
| KH           | Cambodia     |
| CM           | Cameroon     |
| ET           | Ethiopia     |
| GM           | Gambia       |
| GH           | Ghana        |
| HT           | Haiti        |
| HN           | Honduras     |
| IN           | Indonesia    |
| KN           | Kenya        |
| LE           | Lesotho      |
| LI           | Liberia      |
| ML           | Mali         |
| NM           | Namibia      |
| NG           | Nigeria      |

|     |              |
|-----|--------------|
| PE  | Peru         |
| SN  | Senegal      |
| SL  | Sierra Leone |
| TZ  | Tanzania     |
| UG  | Uganda       |
| ZAM | Zambia       |
| ZIM | Zimbabwe     |
